# Supplementary material for: Dual halogen layers diversify band engineering in Sillén oxyhalide photocatalysts: electronic structure control of SrBi 3 O 4 X 3 (X = Cl, Br, I) via halogen substitution
Source: Royal Society of Chemistry journal article supplement (doi:10.1039/d5cp04120a), 2025-11-26
Supplement: d5cp04120a1.pdf [file d5cp04120a1.pdf]

## Supporting Information

### Dual halogen layers diversify band engineering in Sillén oxyhalide photocatalysts: electronic structure control of $\text{SrBi}_3\text{O}_4\text{X}_3$ ( $\text{X} = \text{Cl}, \text{Br}, \text{I}$ ) *via* halogen substitution

Yusuke Ishii,<sup>a</sup> Hajime Suzuki,<sup>\*ab</sup> Osamu Tomita,<sup>a</sup> Akinobu Nakada,<sup>a</sup> Ryu Abe<sup>\*a</sup>

<sup>a</sup>Department of Energy and Hydrocarbon Chemistry, Graduate School of Engineering, Kyoto University, Katsura, Nishikyo-ku, Kyoto 615-8510, Japan

<sup>b</sup>Precursory Research for Embryonic Science and Technology (PRESTO), Japan Science and Technology Agency (JST), 4-1-8 Honcho, Kawaguchi, Saitama 332-0012, Japan

\*Corresponding Author: suzuki.hajime.7x@kyoto-u.ac.jp (H. S.), ryu-abe@scl.kyoto-u.ac.jp (R. A.).

#### Experimental section

##### Materials

$\text{SrCO}_3$  (99.99%),  $\text{BiOCl}$  (95.0%),  $\text{NaBr}$  (99.5%),  $\text{NaI}$  (97%),  $\text{Bi}_2\text{O}_3$  (99.9%),  $\text{CH}_3\text{COONa}$  (99.0%),  $\text{CH}_3\text{COOH}$  (99.7%), and  $\text{Na}_2\text{SO}_4$  (99.0%) were purchased from FUJIFILM Wako Pure Chemical.  $\text{Bi}(\text{NO}_3)_3 \cdot 5\text{H}_2\text{O}$  (99.5 %) was purchased from Kanto Chemical.  $\text{SrI}_2$  (99.99 %) was purchased from Sigma Aldrich.

##### Sample synthesis

$\text{SrBi}_3\text{O}_4\text{X}_3$  ( $\text{X} = \text{Cl}, \text{Br}, \text{and I}$ ) was prepared *via* solid-state reactions based on previously reported methods.<sup>1,2</sup>  $\text{SrBi}_3\text{O}_4\text{Cl}_3$  was synthesized from a stoichiometric mixture of  $\text{SrCO}_3$  and  $\text{BiOCl}$ . The mixture was then loaded into an alumina crucible and calcined at 973 K for 12 h in air.  $\text{SrBi}_3\text{O}_4\text{Br}_3$  was prepared by heating a pellet of a stoichiometric mixture of  $\text{SrCO}_3$  and  $\text{BiOBr}$  in an evacuated silica tube at 1073 K for 12 h.  $\text{SrBi}_3\text{O}_4\text{I}_3$  was synthesized by calcining a mixture of  $\text{SrI}_2$ ,  $\text{Bi}_2\text{O}_3$ , and  $\text{BiOI}$  in a molar ratio of 1.1:1:1 in an evacuated silica tube at 1073 K for 12 h. We used the as-purchased  $\text{BiOCl}$  and prepared  $\text{BiOX}$  ( $\text{X} = \text{Br}, \text{I}$ ), which was synthesized by following a previously reported soft liquid deposition method.<sup>3</sup>

##### Characterization

Powder X-ray diffraction (MiniFlex II, Rigaku,  $\text{CuK}\alpha$  X-ray source), UV–visible diffuse reflectance spectrometry (V-650, JASCO), and scanning electron microscopy (SEM; NVision 40, Carl Zeiss-SIINT) were used to characterize the samples. The scanning electron microscope was equipped with an energy-dispersive X-ray spectrometer. VESTA software was used to construct crystal structures.<sup>4</sup>

##### Electrochemical measurements

Mott–Schottky plots were measured using a three-electrode cell equipped with a Pt wire counter-electrode and  $\text{Ag}/\text{AgCl}$  reference electrode in a  $\text{Na}_2\text{SO}_4$  solution (0.1 M,  $\text{pH} = 2.0$ , adjusted with 0.1 M  $\text{H}_2\text{SO}_4$  aq.) using an electrochemical analyzer (VersaSTAT 4, Princeton Applied Research) with an amplitude of 10 mV and frequency of 500 and 1000 Hz. Electrodes were prepared using the squeegee method. A particulate sample containing a small amount of water was coated onto a fluorine-doped tin oxide conductive substrate and dried overnight at room temperature.

##### DFT calculations

The electronic structures of  $\text{SrBi}_3\text{O}_4\text{X}_3$  ( $\text{X} = \text{Cl}, \text{Br}, \text{I}$ ) were calculated using the Cambridge Serial Total Energy Package (CASTEP).<sup>5</sup> The calculated models of  $\text{SrBi}_3\text{O}_4\text{X}_3$  assumed that  $\text{Bi}^{3+}$  and  $\text{Sr}^{2+}$  are ordered at the  $\text{Bi}2/\text{Sr}2$  site in a  $\sqrt{2} \times \sqrt{2} \times 1$  supercell (Fig. S5). The Perdew–Burke–Ernzerhof functional (PBE)

generalized gradient approximation (GGA) was used as the exchange-correlation functional,<sup>6</sup> and the electronic states were expanded using a plane-wave basis set with a cutoff of 630 eV. The k-point meshes were set as  $3 \times 3 \times 1$ . Before the partial density of states (PDOS) calculation, geometry optimization was performed using the Broyden–Fletcher–Goldfarb–Shannon (BFGS) algorithm. The crystal orbital Hamilton population (COHP) was calculated using the Quantum Espresso package<sup>7</sup> and Local-Orbital Basis Suite Toward Electronic-Structure Reconstruction (LOBSTER) package.<sup>8</sup> The PBE functional for solids (PBEsol) GGA was used as the exchange-correlation functional.<sup>9</sup> A cutoff energy of 100 Ry (~1361 eV) and  $6 \times 6 \times 2$  k points were used. We confirmed that the calculated PDOS was similar to that calculated using CASTEP, as described above.

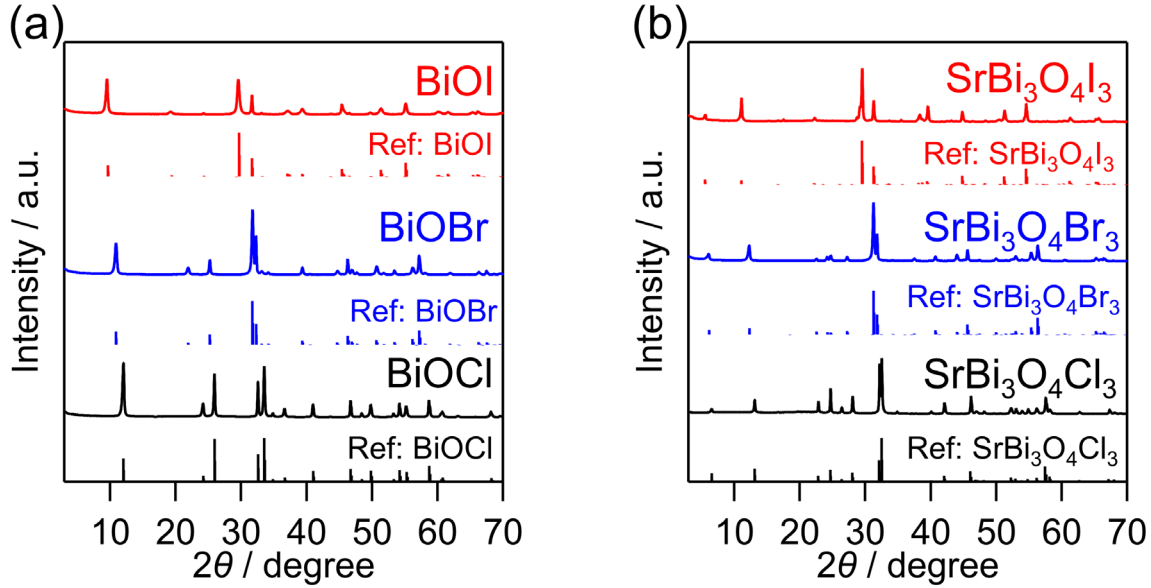

**Fig. S1** XRD patterns of (a) BiOX ( $X = \text{Cl}, \text{Br}, \text{I}$ ) and (b)  $\text{SrBi}_3\text{O}_4\text{X}_3$ , along with reference patterns of BiOCl (COD #4509949), BiOBr (COD #1010421), BiOI (COD #4341500),  $\text{SrBi}_3\text{O}_4\text{Cl}_3$  (previous report<sup>10</sup>),  $\text{SrBi}_3\text{O}_4\text{Br}_3$  (COD #1539104), and  $\text{SrBi}_3\text{O}_4\text{I}_3$  (ICSD #76963).

**Table S1** Average Sr/Bi and X/Bi atomic ratios in  $\text{SrBi}_3\text{O}_4\text{X}_3$  ( $X = \text{Cl}, \text{Br}, \text{I}$ ), determined from energy-dispersive X-ray spectroscopy mapping at three locations for each sample.

| $\text{SrBi}_3\text{O}_4\text{X}_3$ | Sr/Bi | X/Bi |
|-------------------------------------|-------|------|
| $X = \text{Cl}$                     | 0.30  | 0.82 |
| $X = \text{Br}$                     | 0.30  | 0.96 |
| $X = \text{I}$                      | 0.31  | 1.01 |

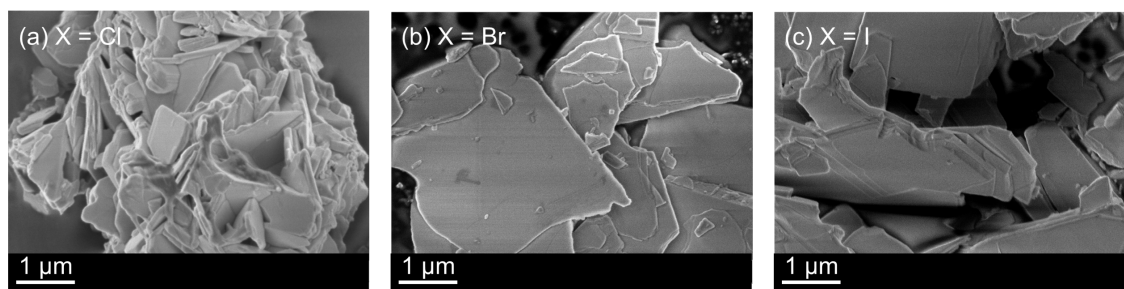

**Fig. S2** SEM images of  $\text{SrBi}_3\text{O}_4\text{X}_3$  (X = (a) Cl, (b) Br, (c) I).

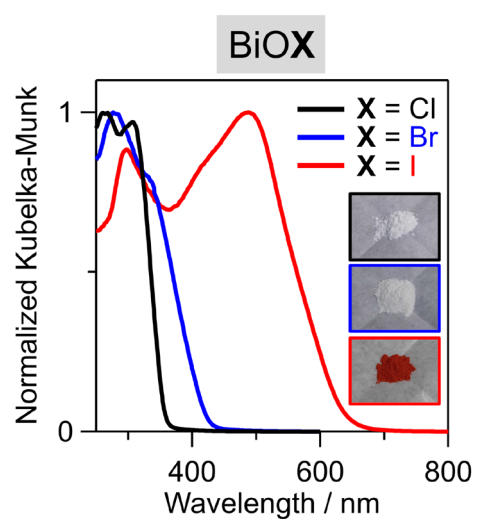

**Fig. S3** UV-vis diffuse reflectance spectra of  $\text{BiOX}$  (X = Cl, Br, I).

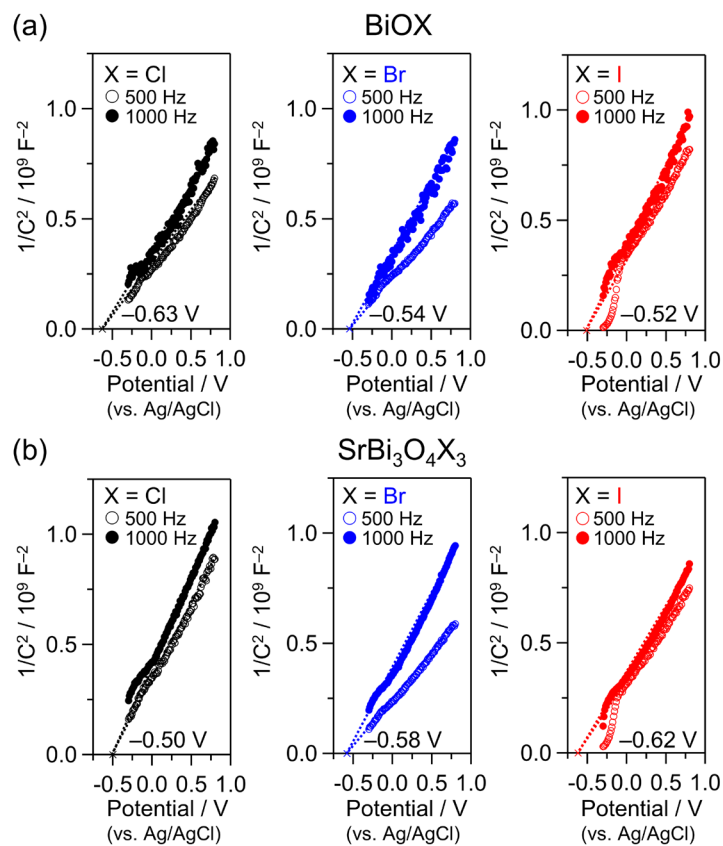

**Fig. S4** Mott–Schottky plots for (a) BiOX (X = Cl, Br, I) and (b) SrBi<sub>3</sub>O<sub>4</sub>X<sub>3</sub>.

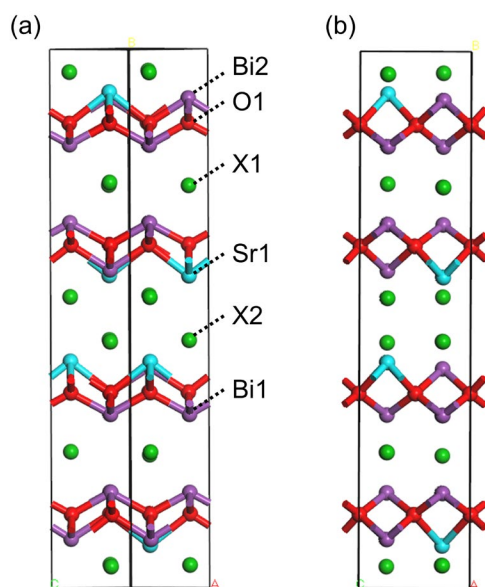

**Fig. S5** Structural models of SrBi<sub>3</sub>O<sub>4</sub>X<sub>3</sub> (X = Cl, Br, I) used for the DFT calculations, viewed from two different directions corresponding to the [100] and [110] directions of the original structures.

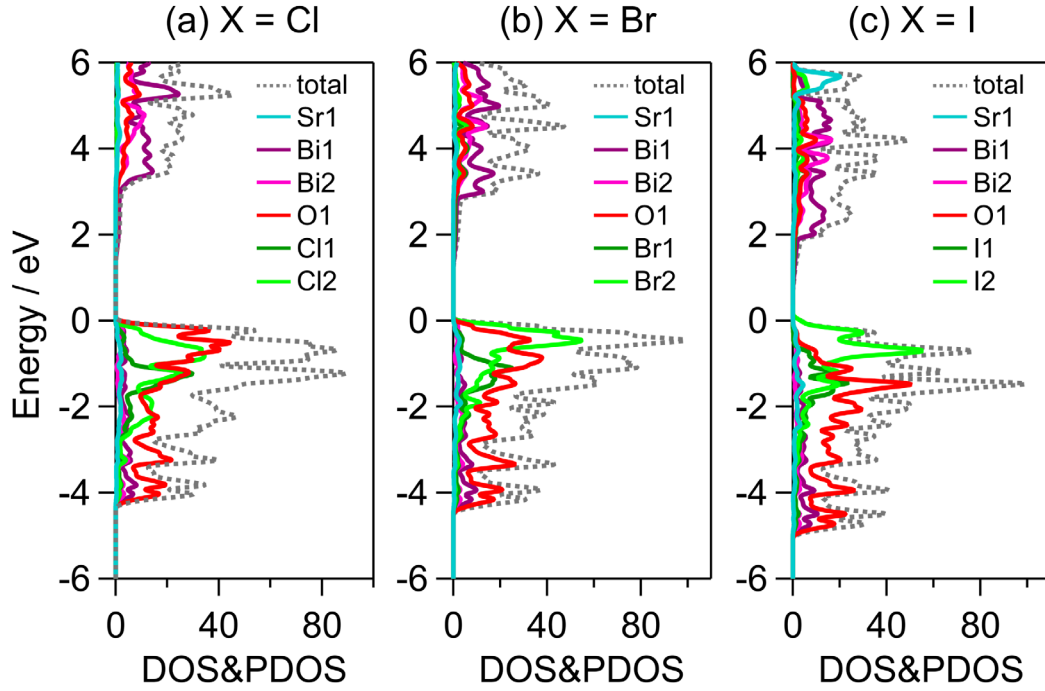

**Fig. S6** DOS and PDOS near the VBM and CBM of  $\text{SrBi}_3\text{O}_4\text{X}_3$  (X = (a) Cl, (b) Br, (c) I), calculated using the structural models shown in Fig. S5.

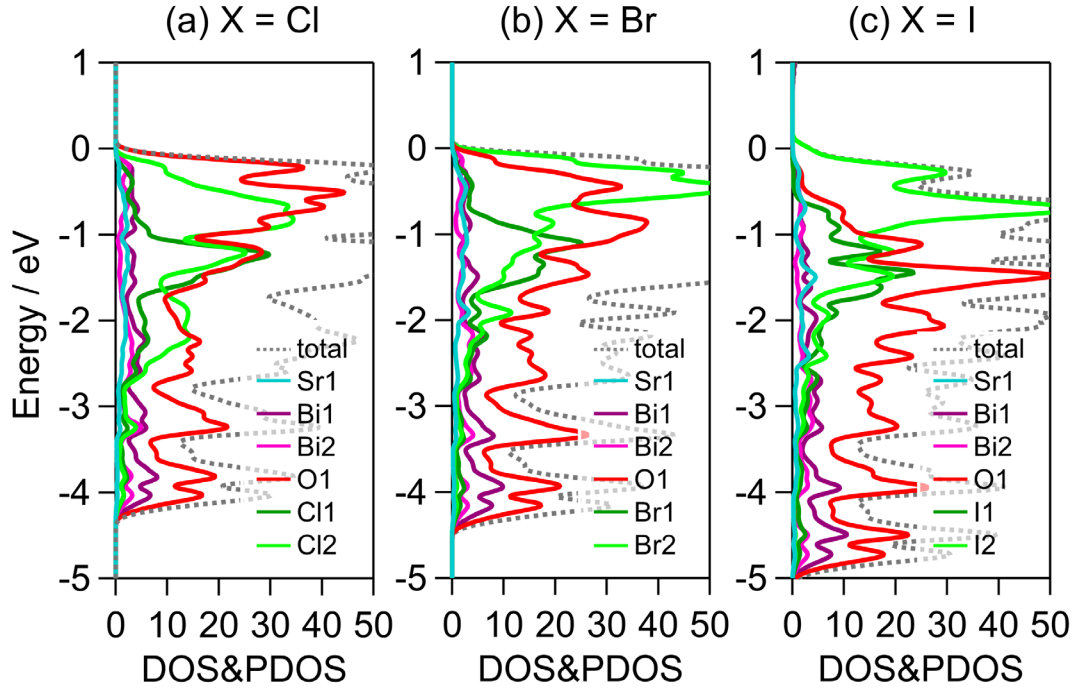

**Fig. S7** Enlarged DOS and PDOS near the VBM of  $\text{SrBi}_3\text{O}_4\text{X}_3$  (X = (a) Cl, (b) Br, (c) I), based on the structural models shown in Fig. S5.

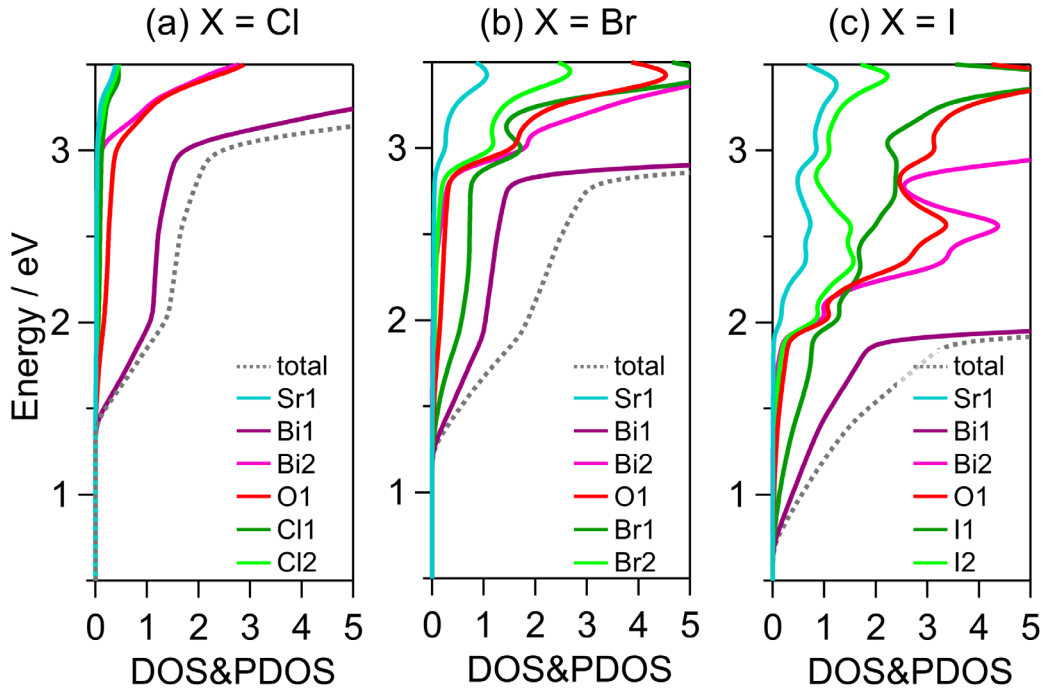

**Fig. S8** Enlarged DOS and PDOS near the CBM of  $\text{SrBi}_3\text{O}_4\text{X}_3$  ( $\text{X} =$  (a) Cl, (b) Br, (c) I), based on the structural models shown in Fig. S5.

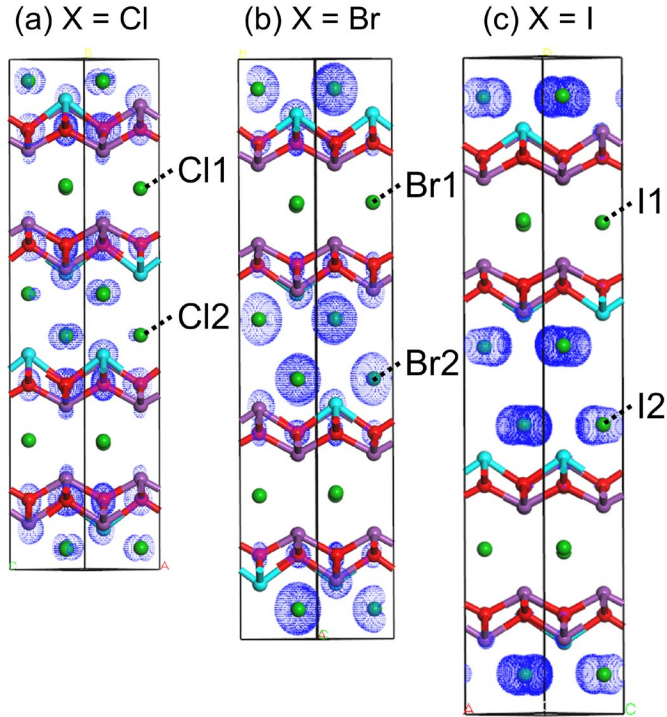

**Fig. S9** Orbital distributions of the VBM (blue dots) estimated by DFT calculations for  $\text{SrBi}_3\text{O}_4\text{X}_3$  ( $\text{X} =$  (a) Cl, (b) Br, (c) I) (isosurface values:  $0.0075 \text{ e}/\text{\AA}^3$ ).

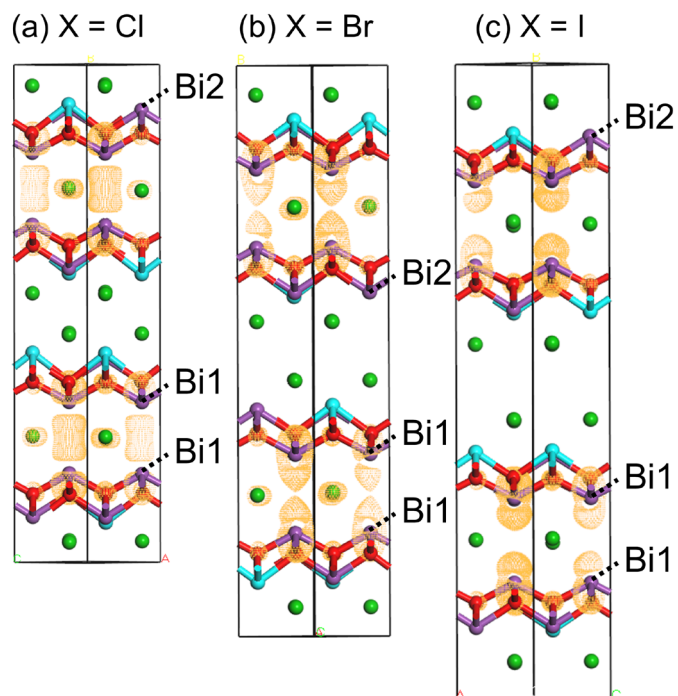

**Fig. S10** Orbital distributions of the CBM (orange dots) estimated by DFT calculations for  $\text{SrBi}_3\text{O}_4\text{X}_3$  ( $\text{X} =$  (a) Cl, (b) Br, (c) I) (isosurface values:  $0.0075 \text{ e}/\text{\AA}^3$ ).

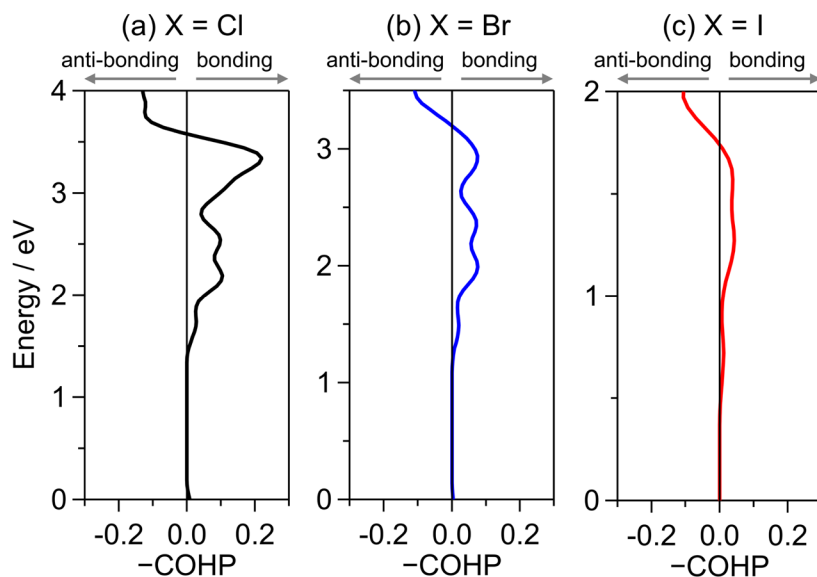

**Fig. S11** COHPs for interlayer  $\text{Bi1}(6p_z)\text{--Bi1}(6p_z)$  interaction in  $\text{SrBi}_3\text{O}_4\text{X}_3$  ( $\text{X} =$  (a) Cl, (b) Br, (c) I).

## References

1. Y. Ishii, H. Suzuki, K. Ogawa, O. Tomita, A. Saeki and R. Abe, *Sustain Energy Fuels*, 2022, **6**, 3263–3270.
2. L. G. Sillén and E. Jörnstad, *Z. Anorg. Allg. Chem.*, 1942, **250**, 173–198.

3. R. D. Shannon and R. K. Waring, *J. Phys. Chem. Solids*, 1985, **46**, 325–330.
4. K. Momma and F. Izumi, *J. Appl. Crystallogr.*, 2011, **44**, 1272–1276.
5. S. J. Clark, M. D. Segall, C. J. Pickard, P. J. Hasnip, M. I. J. Probert, K. Refson and M. C. Payne, *Z. für Krist. - Cryst. Mater.*, 2005, **220**, 567–570.
6. J. P. Perdew, K. Burke and M. Ernzerhof, *Phys. Rev. Lett.*, 1996, **77**, 3865–3868.
7. P. Giannozzi, S. Baroni, N. Bonini, M. Calandra, R. Car, C. Cavazzoni, D. Ceresoli, G. L. Chiarotti, M. Cococcioni, I. Dabo, A. D. Corso, S. de Gironcoli, S. Fabris, G. Fratesi, R. Gebauer, U. Gerstmann, C. Gougoussis, A. Kokalj, M. Lazzeri, L. Martin-Samos, N. Marzari, F. Mauri, R. Mazzarello, S. Paolini, A. Pasquarello, L. Paulatto, C. Sbraccia, S. Scandolo, G. Sclauzero, A. P. Seitsonen, A. Smogunov, P. Umari and R. M. Wentzcovitch, *J. Phys.: Condens. Matter*, 2009, **21**, 395502.
8. S. Maintz, V. L. Deringer, A. L. Tchougréeff and R. Dronskowski, *J. Comput. Chem.*, 2016, **37**, 1030–1035.
9. J. P. Perdew, A. Ruzsinszky, G. I. Csonka, O. A. Vydrov, G. E. Scuseria, L. A. Constantin, X. Zhou and K. Burke, *Phys. Rev. Lett.*, 2009, **102**, 039902.
10. H. Suzuki, D. Ozaki, Y. Ishii, O. Tomita, D. Kato, S. Nozawa, K. Nakashima, A. Saeiki, H. Kageyama and R. Abe, *J. Mater. Chem. A*, 2023, **11**, 15159–15167.
